# Supplementary material for: All hands on Dec: Treating cryptococcosis with dectin decorated liposomes loaded with antifungals
Source: PubMed Central journal article supplement — iScience. 2024 Jun 22;27(7):110349. doi: 10.1016/j.isci.2024.110349 (PMC11269288; doi:10.1016/j.isci.2024.110349), 2024-06-22
Supplement: mmc1.pdf [file mmc1.pdf]

**iScience, Volume 27**

**Supplemental information**

**All hands on Dec: Treating  
cryptococcosis with dectin decorated  
liposomes loaded with antifungals**

**Tuyetnhu Pham, Ran Shi, Suresh Ambati, Richard Meagher, and Xiaorong Lin**

Figure S1:

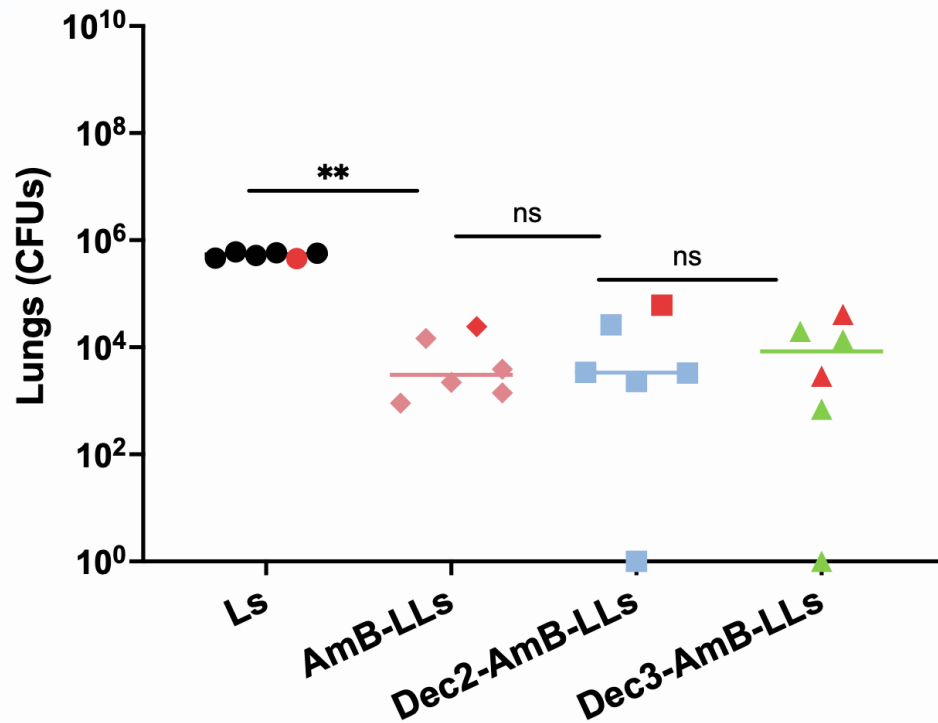

**Figure S1: DectiSomes are effective against pulmonary cryptococcosis when dosed once or twice, Related to Figure 1.** Lung fungal burdens for mice treated with Ls, AmB-LLs, Dec2-AmB-LLs, or Dec3-AmB-LLs. Red – mice were treated twice.
